# Supplementary material for: β-catenin is a molecular switch that regulates transition of cell-cell adhesion to fusion
Source: PubMed Central journal article supplement — Sci Rep. 2011 Aug 19;1:68. doi: 10.1038/srep00068 (PMC3216555; doi:10.1038/srep00068), 2011-08-19
Supplement: srep00068-s3.pdf [file srep00068-s3.pdf]

*Supplementary Information to*

**$\beta$ -catenin is a molecular switch that regulates transition of cell-cell adhesion to fusion**

Youki Takezawa, Keiichi Yoshida, Kenji Miyado, Masahiro Sato, Akihiro Nakamura, Natsuko Kawano, Keiichi Sakakibara, Takahiko Kondo, Yuichirou Harada, Naoko Ohnami, Seiya Kanai, Mami Miyado, Hidekazu Saito, Yuji Takahashi, Hidenori Akutsu and Akihiro Umezawa

This file includes:

- Supplementary Figures S1 – S7

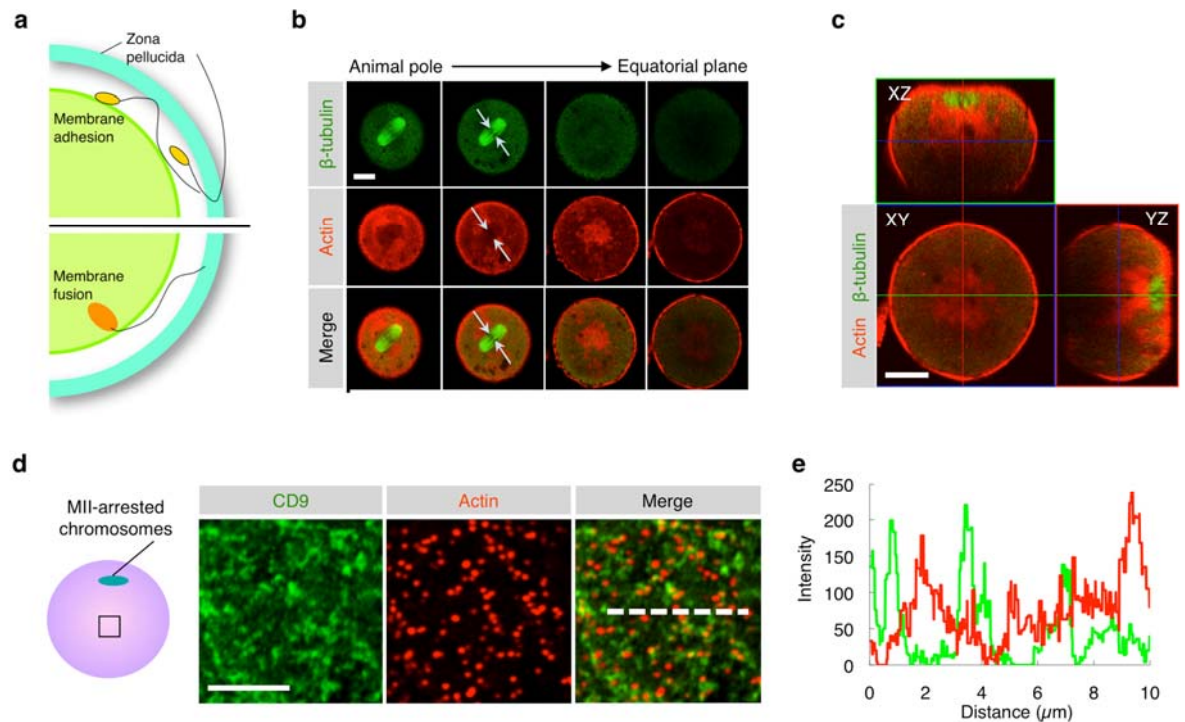

**Figure S1. Possible involvement of actin microfilaments in fertilization.**

**a**, Schematic model of membrane adhesion and fusion between sperm and oocytes at fertilization. **b**, Localization of  $\beta$ - and  $\gamma$ -actin isoforms and  $\beta$ -tubulin in superovulated C57BL/6N oocytes. Images of serial sections were captured from a region containing metaphase II-arrested (MII) chromosomes (indicated by arrows) to the inner portion of the oocyte, and among them, selected images are shown. Scale bar: 20  $\mu\text{m}$ . **c**, Two-dimensional images (shown as XY, XZ and YZ axes) after reconstruction of the three-dimensional (3D) images in **b**. Scale bar: 20  $\mu\text{m}$ . **d**, Diverse localization of  $\beta$ - and  $\gamma$ -actin isoforms and CD9 on the oocyte cell membrane. The membrane region captured is indicated in a box on the left. Scale bar: 5  $\mu\text{m}$ . **e**, The fluorescent intensity of  $\beta$ - and  $\gamma$ -actin isoforms and CD9 on the oocyte cell membrane after scanning along the dotted line shown as 'Merge' in **d**. Red and green lines indicate fluorescence intensities for actin and CD9, respectively.

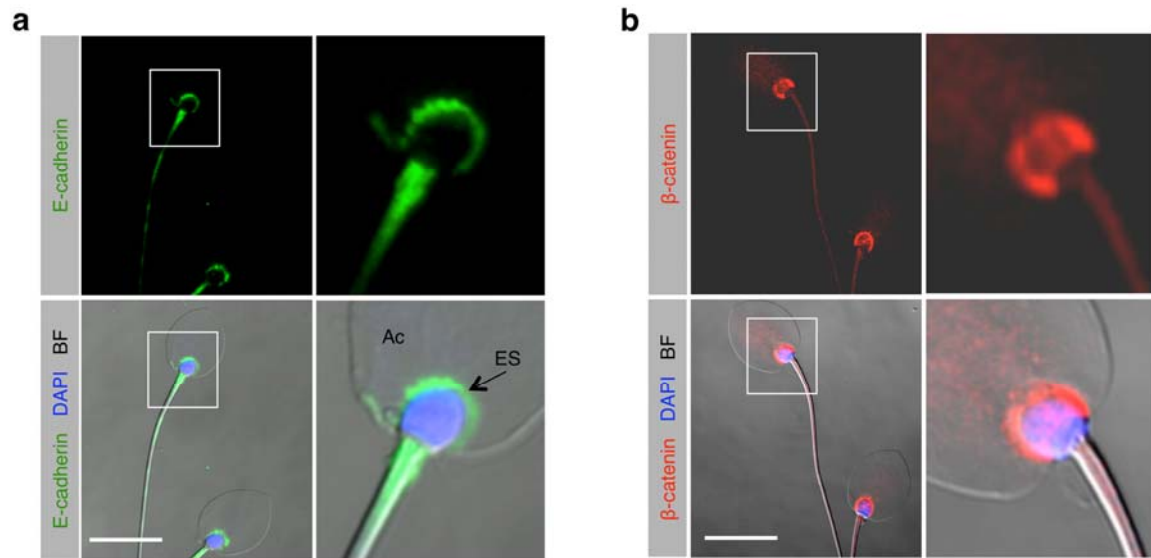

**Figure S2. Localization of E-cadherin and  $\beta$ -catenin in epididymal sperm of an insectivore, *Suncus murinus*.**

**a**, Localization of E-cadherin in *Suncus* sperm (permeabilized). Ac, acrosome; ES, equatorial segment. **b**, Localization of  $\beta$ -catenin in *Suncus* sperm. In each panel, boxes in left sets of panels were enlarged and shown on the right. Scale bar: 5  $\mu$ m.

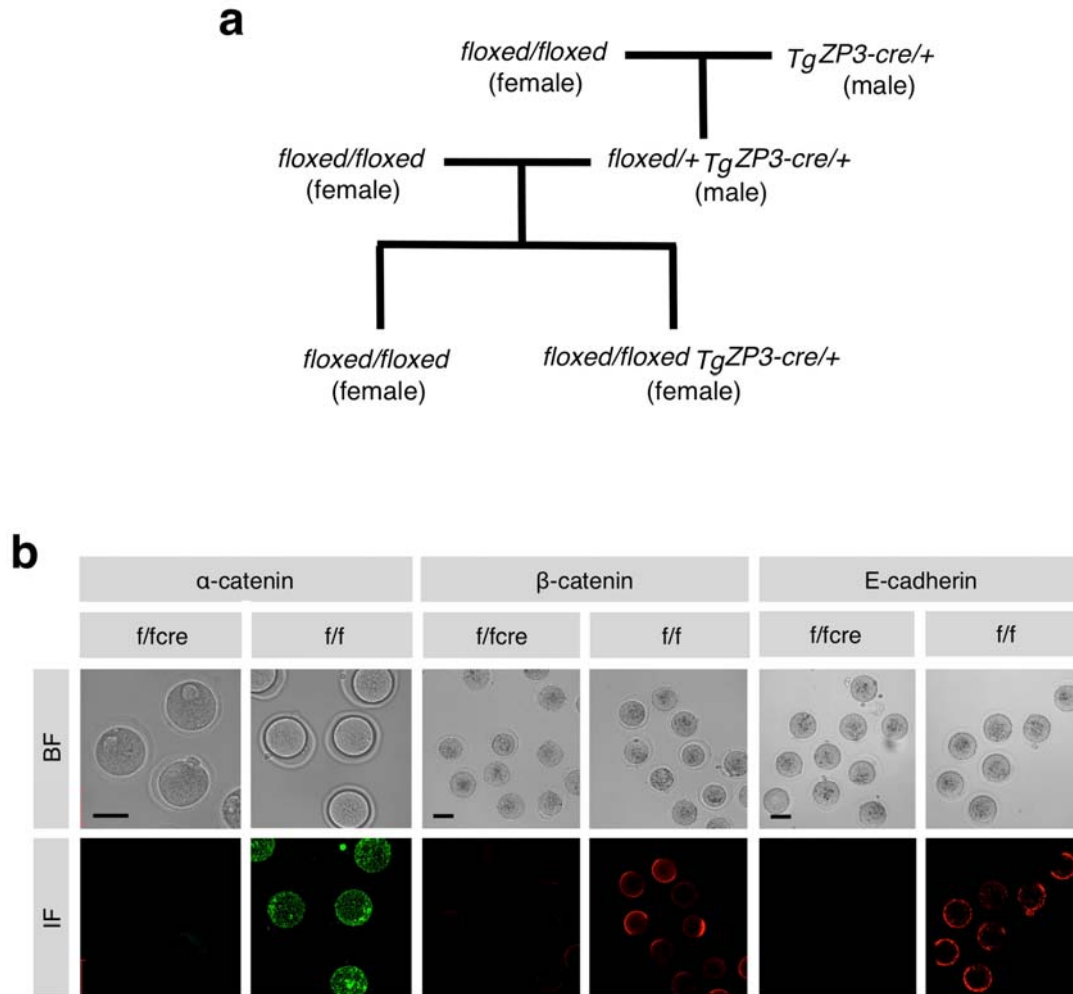

**Figure S3. Generation of oocytes lacking expression of β-catenin, α-catenin or E-cadherin.**

**a**, Procedure for generation of female mice with oocytes lacking expression of each type of gene. Three strains of floxed mice (*E-cadherin*<sup>floxed/floxed</sup>, *β-catenin*<sup>floxed/floxed</sup>, and *α-catenin*<sup>floxed/floxed</sup>) were intercrossed with mice carrying a transgene expressing cre-recombinase (*Tg*<sup>ZP3-cre/+</sup>) in oocytes (see Experimental Procedures). **b**, Expression of β-catenin, α-catenin or E-cadherin in oocytes from offspring of floxed mice mated to cre-recombinase-expressing Tg mice. Ovulated oocytes were immunostained with each mAb. Note that oocytes (f/fcre) lacking each of these genes exhibit no target protein expression. BF, bright field; IF, Immunofluorescence. Scale bars: 50 μm.

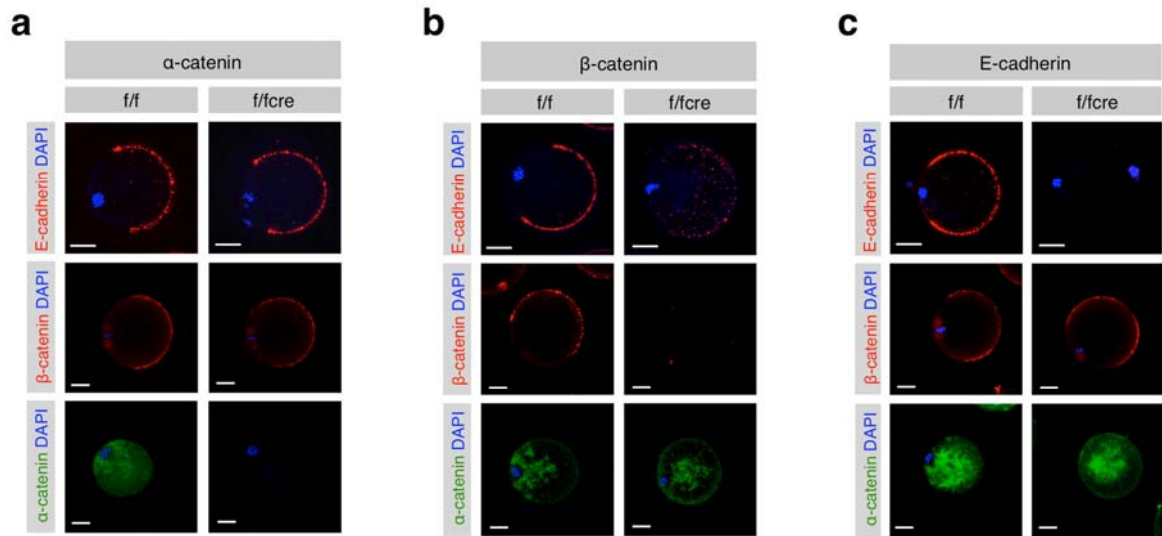

**Figure S4. Close interaction between  $\beta$ -catenin and E-cadherin on the oocyte cell membrane.**

Ovulated oocytes lacking each of  $\alpha$ -catenin (a),  $\beta$ -catenin (b) and *E-cadherin* (c) genes were immunostained with mAbs against these three proteins. Mutual expression patterns in oocytes (f/fcre) lacking each of  $\alpha$ -catenin,  $\beta$ -catenin and *E-cadherin* genes were compared with those in oocytes (f/f) of control floxed mice. Scale bars: 20  $\mu$ m.

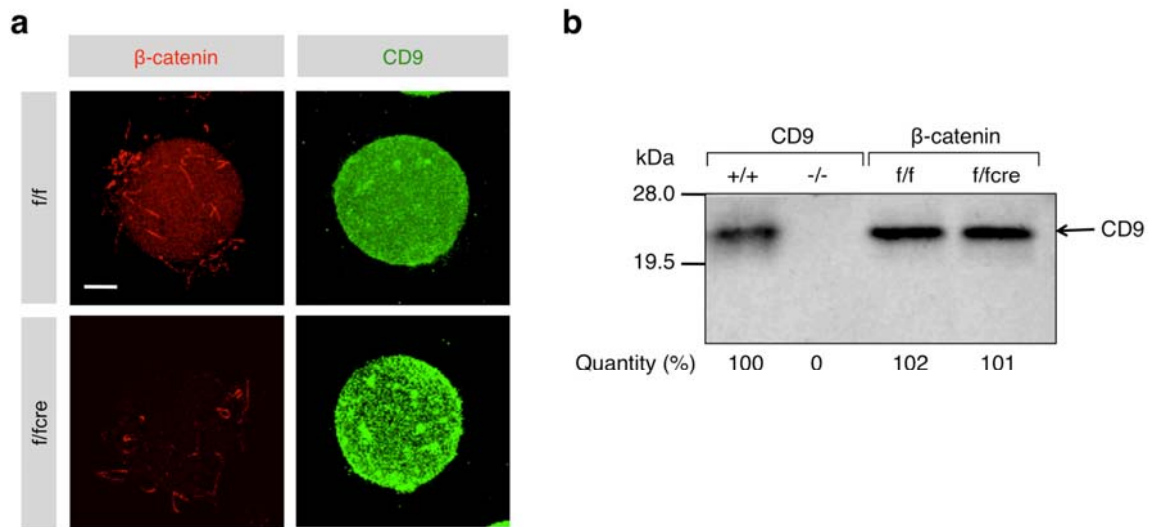

**Figure S5. Expression of CD9 in  $\beta$ -catenin-deficient oocytes.**

**a**, Immunocytochemical localization of CD9 and  $\beta$ -catenin in the  $\beta$ -catenin<sup>flox/flox</sup>*Tg*<sup>ZP3-cre/+</sup> (f/fcre) and  $\beta$ -catenin<sup>flox/flox</sup> (f/f) oocytes with adhered sperm. Note that  $\beta$ -catenin expression is lacking in f/fcre oocytes, but present in the adhered normal sperm. Furthermore, CD9 expression is still seen in f/fcre oocytes. Scale bar: 20  $\mu$ m. **b**, Quantitative analyses of CD9 in wild-type (+/+), CD9 KO (-/-),  $\beta$ -catenin<sup>flox/flox</sup> (f/f) and  $\beta$ -catenin<sup>flox/flox</sup>*Tg*<sup>ZP3-cre/+</sup> (f/fcre) ovulated oocytes. Cell extracts of 10 oocytes were applied in each lane. The amounts of CD9 were densitometrically measured, normalized by the levels of CD9 expressed in +/+ oocytes, and shown as Quantity (%) below the figure.

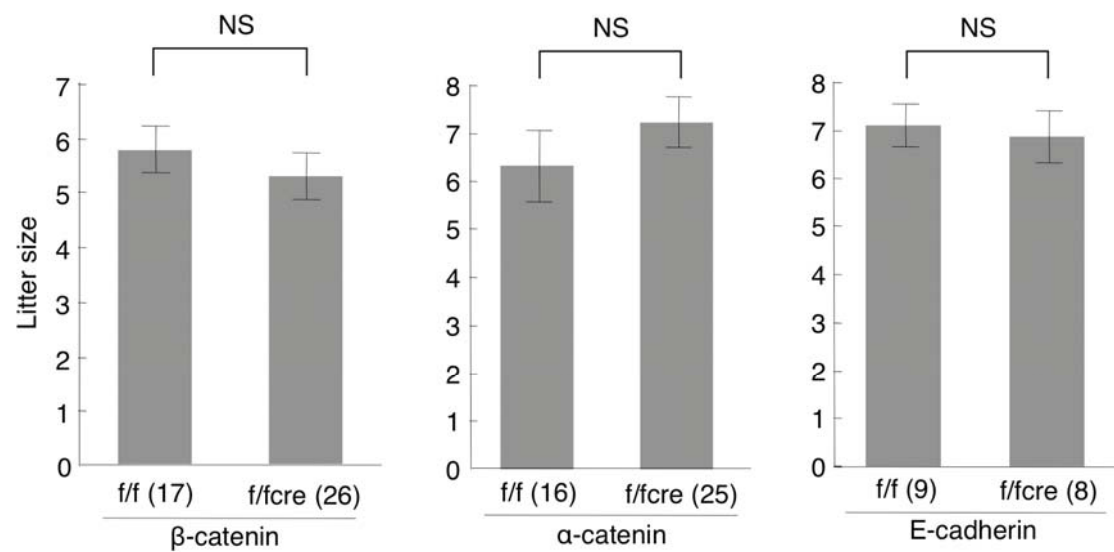

**Figure S6. Litter sizes of female mice lacking each of  $\beta$ -catenin,  $\alpha$ -catenin, and E-cadherin genes in oocytes.**

Each of these female mice was mated with C57BL/6N males, and their mean litter sizes were determined (see Methods). Parentheses indicate the total number of female mice examined in each group. NS, not significant. Values are the mean  $\pm$  SE.

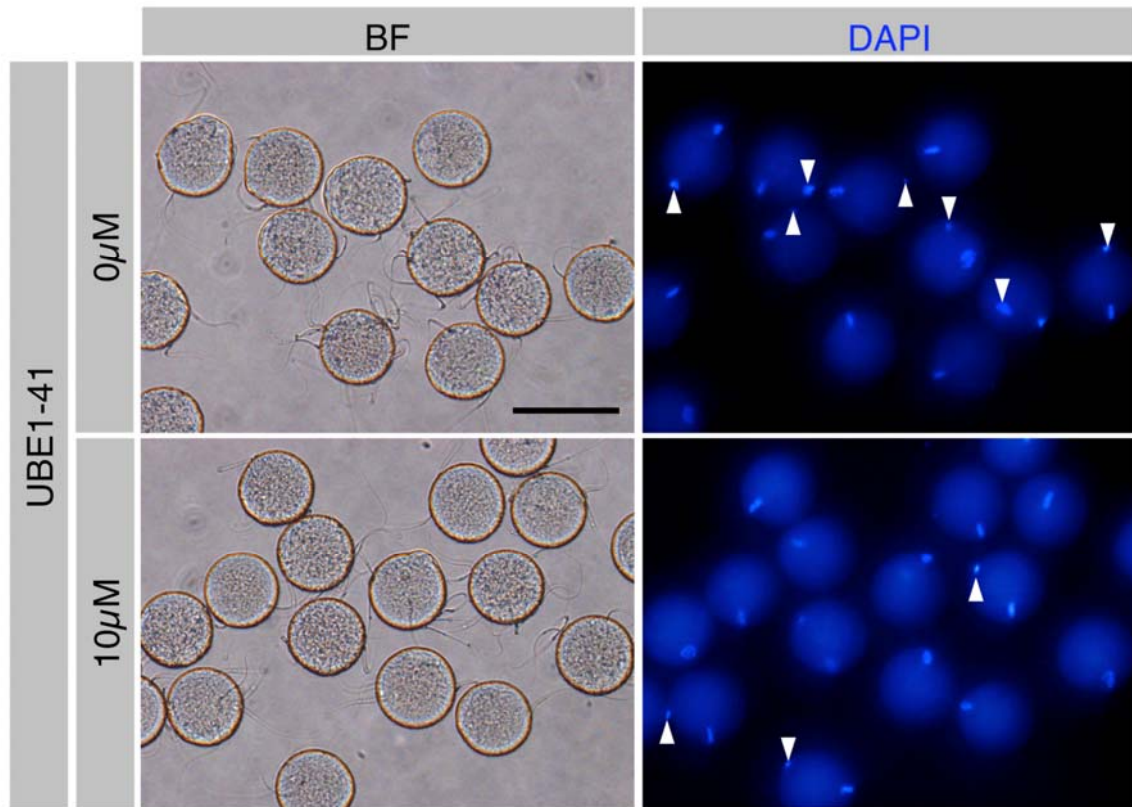

**Figure S7. Reduced fusing ability of “zona-free” oocytes treated with UBE1-41.**

After treatment of oocytes in the presence or absence of UBE1-41, oocytes were subjected to ZP removal, stained with DAPI, and then incubated with C57BL/6N sperm for 30 min. Note that in UBE1-41-treated oocytes, the number of DAPI-positive sperm (shown by arrowheads) is decreased. BF, bright field. Scale bar: 100  $\mu$ m.
